# Supplementary material for: Microlens array enhanced upconversion luminescence at low excitation irradiance
Source: Royal Society of Chemistry journal article supplement (doi:10.1039/c9nr03105g), 2019-01-01
Supplement: c9nr03105g1.pdf [file c9nr03105g1.pdf]

# Microlens Array Enhanced Upconversion Luminescence at Low Excitation Irradiance

Qingyun Liu,<sup>a,b</sup> Haichun Liu,<sup>\*a</sup> Deyang Li,<sup>b</sup> Wen Qiao,<sup>c</sup> Guanying Chen,<sup>\*b</sup> Hans Ågren<sup>\*a,b,d</sup>

<sup>a</sup> Department of Theoretical chemistry and Biology, KTH Royal Institute of Technology, Stockholm, Sweden.

<sup>b</sup> School of Chemistry and Chemical Engineering, Harbin Institute of Technology, Harbin, P.R. China.

<sup>c</sup> School of Optoelectronic Science and Engineering & Collaborative Innovation Center of Suzhou Nano Science and Technology, Soochow University, Suzhou 215006, P.R. China

<sup>d</sup> College of Chemistry and Chemical Engineering, Henan University, Kaifeng, Henan 475004, P.R. China

\*Corresponding authors:

\*E-mail: hagren@kth.se (Hans Ågren); chenguanying@hit.edu.cn (Guanying Chen); haichun@kth.se

(Haichun Liu)

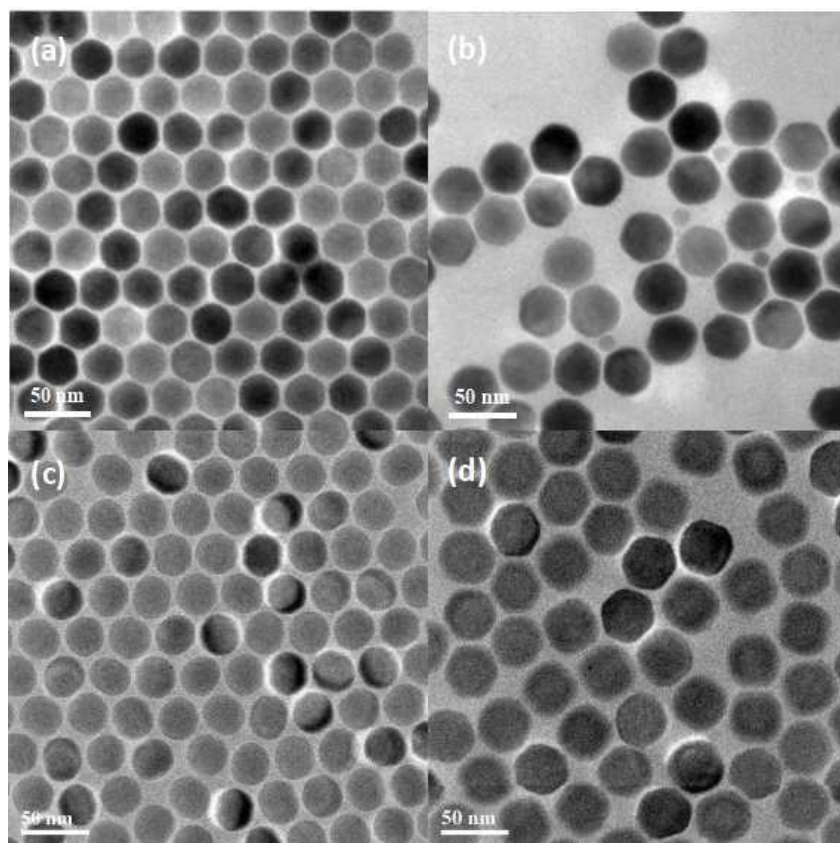

**Figure S1** TEM images of (a) core  $\text{NaYF}_4:20\% \text{Yb}^{3+}, 2\% \text{Er}^{3+}$ , (b) core-shell  $\text{NaYF}_4:20\% \text{Yb}^{3+}, 2\% \text{Er}^{3+} @ 20\% \text{Yb}^{3+}, 30\% \text{Nd}^{3+}$ , (c) core  $\text{NaYF}_4:20\% \text{Yb}^{3+}, 0.5\% \text{Tm}^{3+}$ , (d) core-shell  $\text{NaYF}_4:20\% \text{Yb}^{3+}, 0.5\% \text{Tm}^{3+} @ 20\% \text{Yb}^{3+}, 30\% \text{Nd}^{3+}$  nanoparticles. Scale bars: 50 nm.

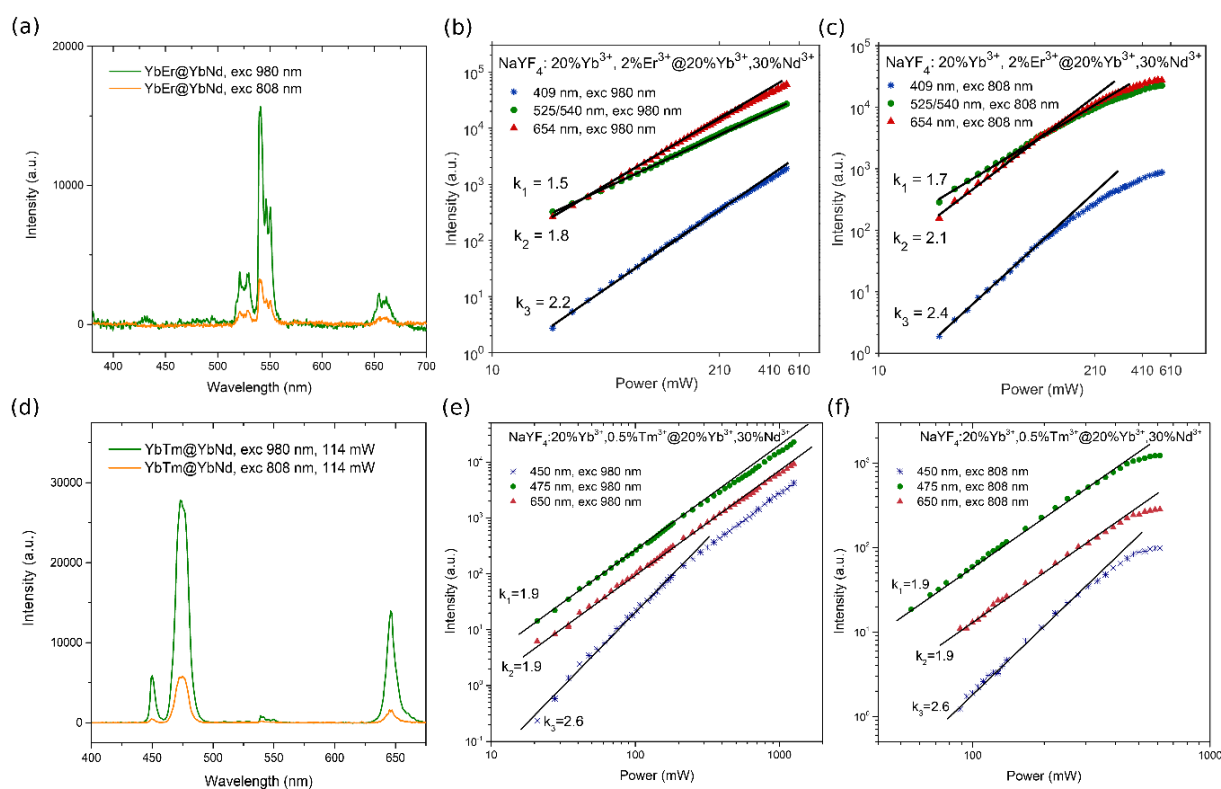

**Figure S2** (a) Upconversion emission spectra of NaYF<sub>4</sub>:20%Yb<sup>3+</sup>, 2%Er<sup>3+</sup>@20%Yb<sup>3+</sup>,30%Nd<sup>3+</sup> nanoparticles under CW 980 nm and 808 nm excitation. Excitation power density for both lasers was 1.3 W/cm<sup>2</sup>. Excitation power-density response of NaYF<sub>4</sub>:20%Yb<sup>3+</sup>, 2%Er<sup>3+</sup>@20%Yb<sup>3+</sup>,30%Nd<sup>3+</sup> under (b) CW 980 nm excitation and (c) CW 808 nm excitation. (d) Upconversion emission spectra of NaYF<sub>4</sub>:20%Yb<sup>3+</sup>, 0.5%Tm<sup>3+</sup>@20%Yb<sup>3+</sup>,30%Nd<sup>3+</sup> nanoparticles under CW 980 nm and 808 nm excitation. Excitation power density for both lasers was 14.5 W/cm<sup>2</sup>. Excitation power-density response of NaYF<sub>4</sub>:20%Yb<sup>3+</sup>, 0.5%Tm<sup>3+</sup>@20%Yb<sup>3+</sup>,30%Nd<sup>3+</sup> under (e) CW 980 nm excitation and (f) CW 808 nm excitation. Laser beam diameter for both lasers: ~1.0 mm.

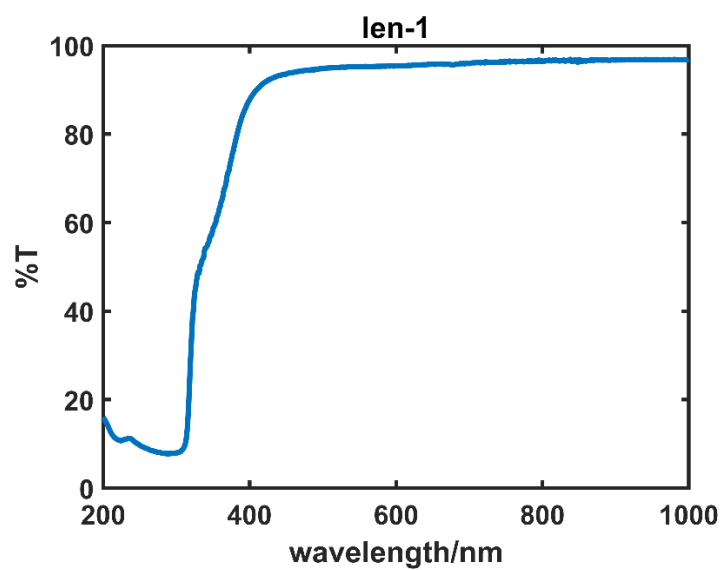

**Figure S3** Transmission spectrum of the microlens array

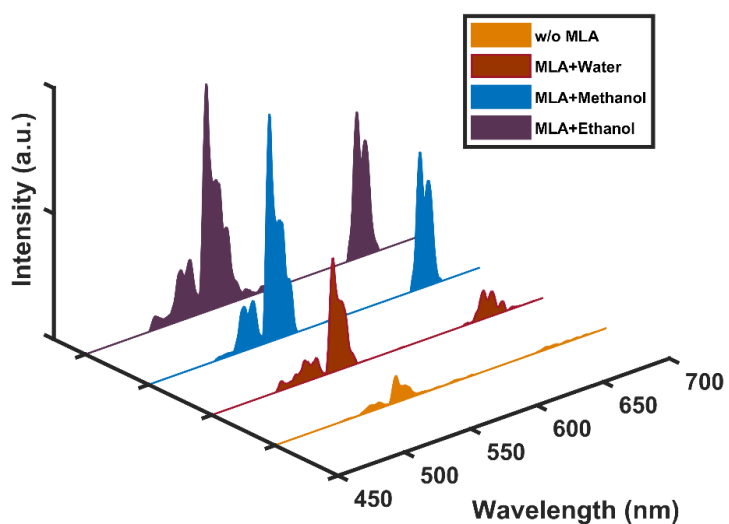

**Figure S4** Upconversion luminescence spectra of NaYF<sub>4</sub>:20%Yb<sup>3+</sup>,2%Er<sup>3+</sup>@20%Yb<sup>3+</sup>,30%Nd<sup>3+</sup> nanoparticles under 980 nm CW excitation (Average excitation intensity: 3.9 W/cm<sup>2</sup>) without and with the addition of microlens array (MLA), using different solvents as the interface medium (ethanol, water, methanol).
